# Supplementary material for: Global Burden of Pediatric Rheumatic Heart Disease, 1990–2021: Analysis of the GBD 2021 Study
Source: MDPI journal article supplement (doi:10.3390/children12070843), 2025-06-26
Supplement: s1 [file Supplemental Figure.pdf › Supplemental Figure.pdf]

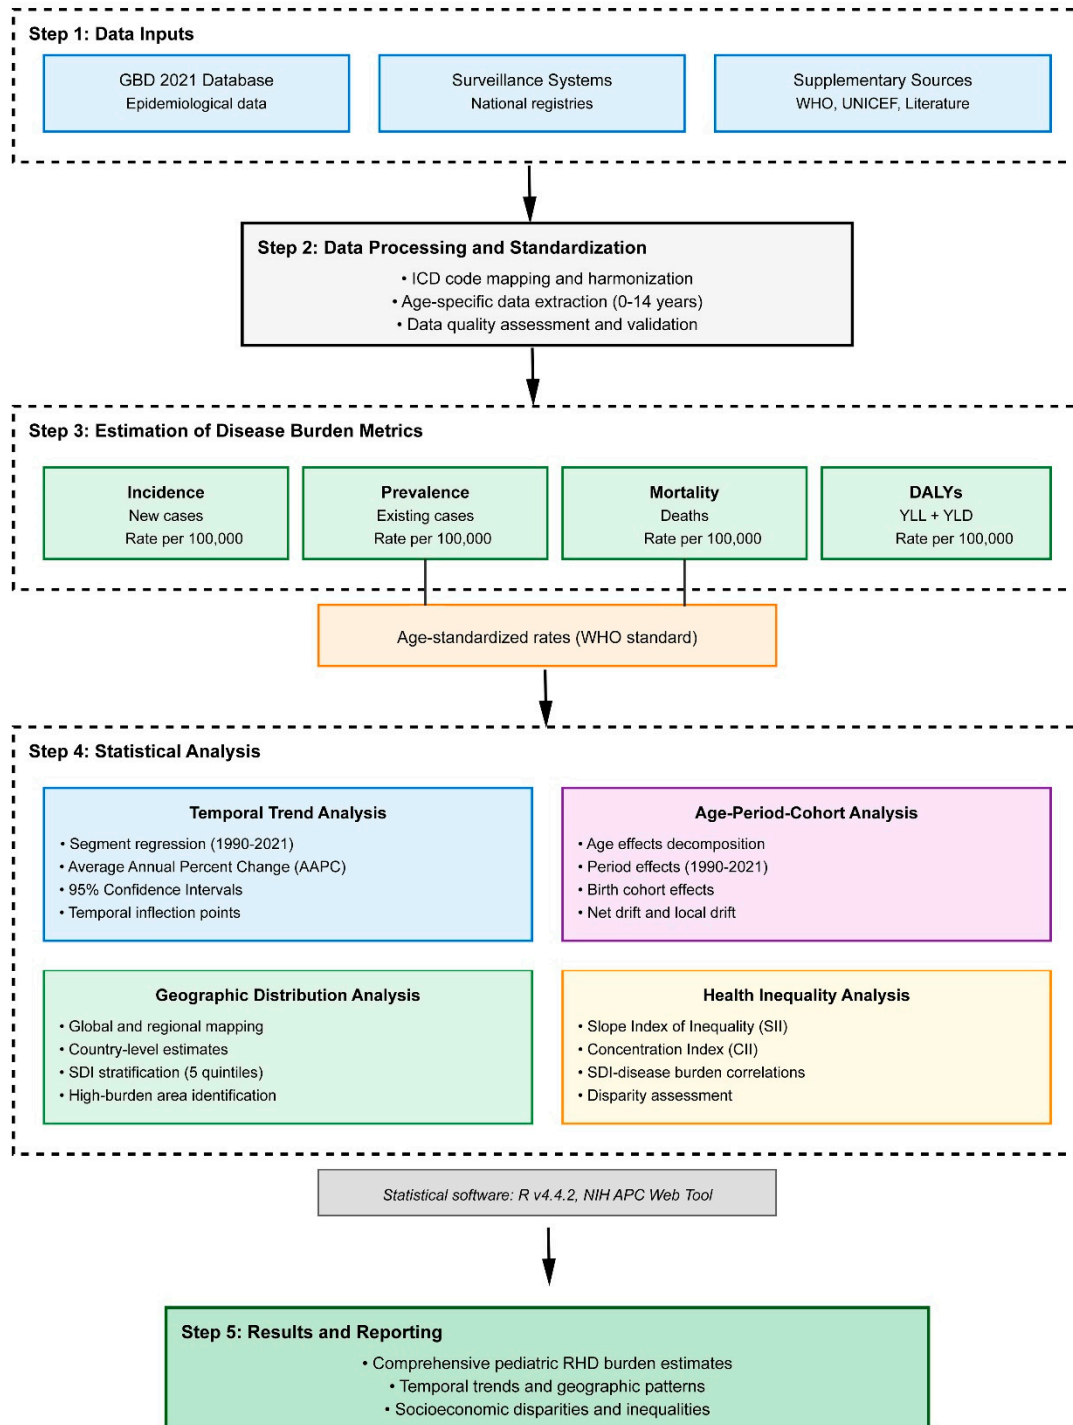

**Figure S1** Analytical framework and data flow for assessing pediatric rheumatic heart disease burden from 1990 to 2021

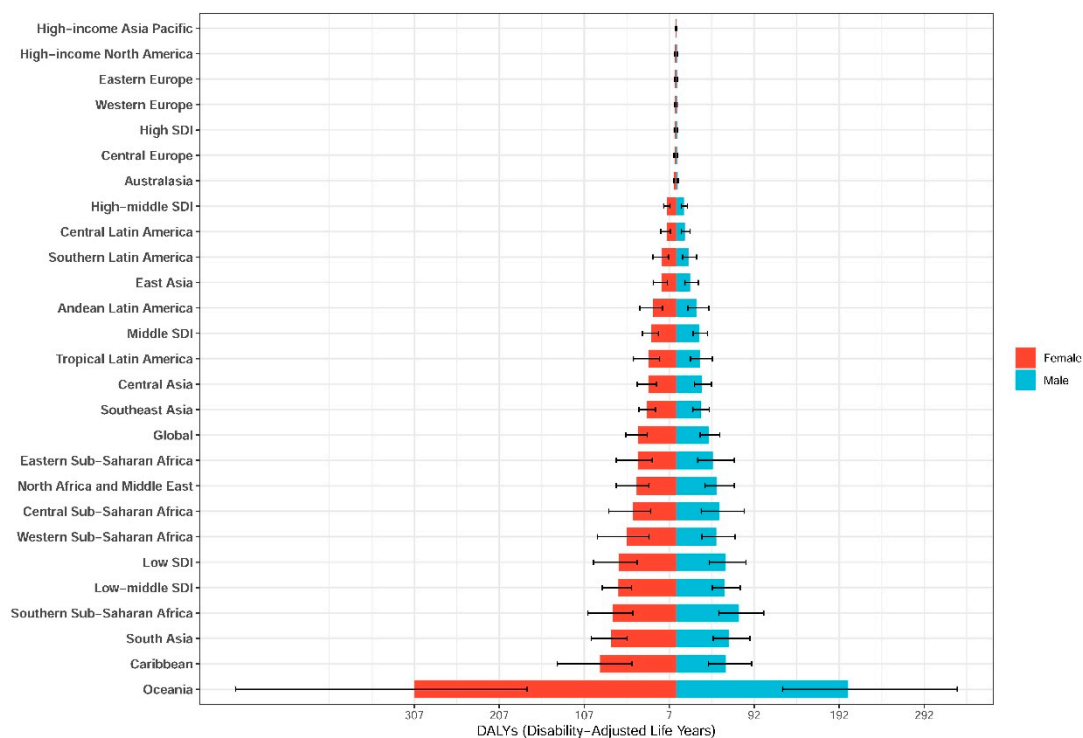

**Figure S2** Age-standardized DALY rates of rheumatic heart disease among children aged 0–14 years by sex and region, 2021

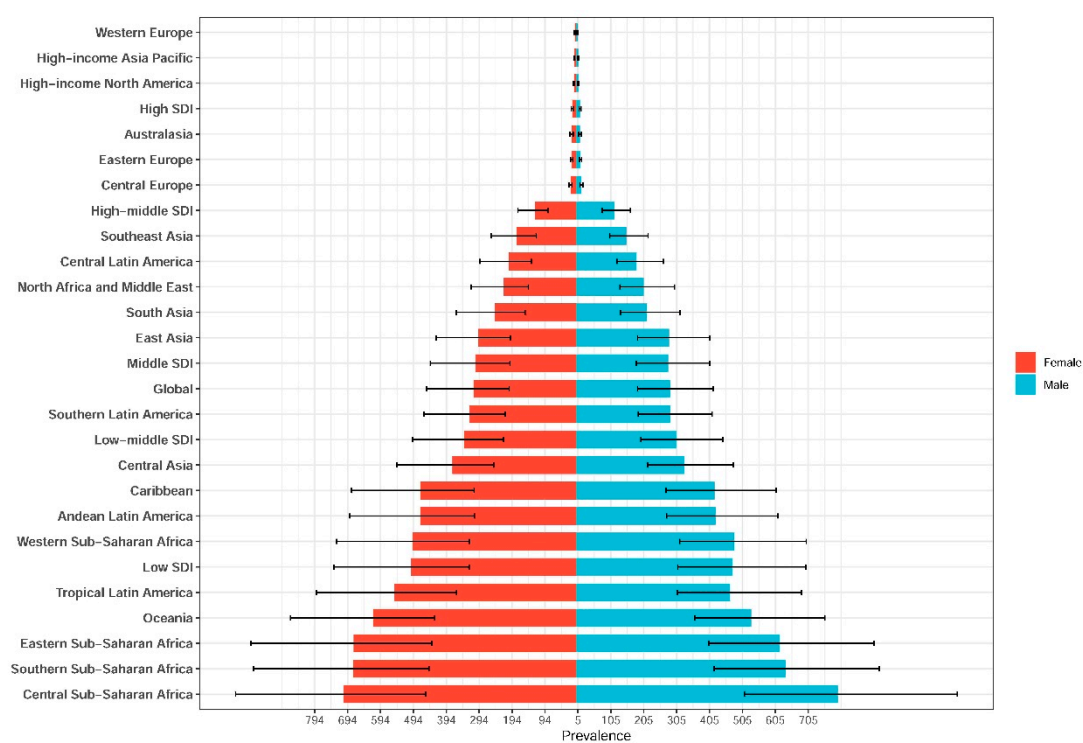

**Figure S3** Age-standardized prevalence rates (ASPR) of rheumatic heart disease among children aged 0–14 years by sex and region, 2021

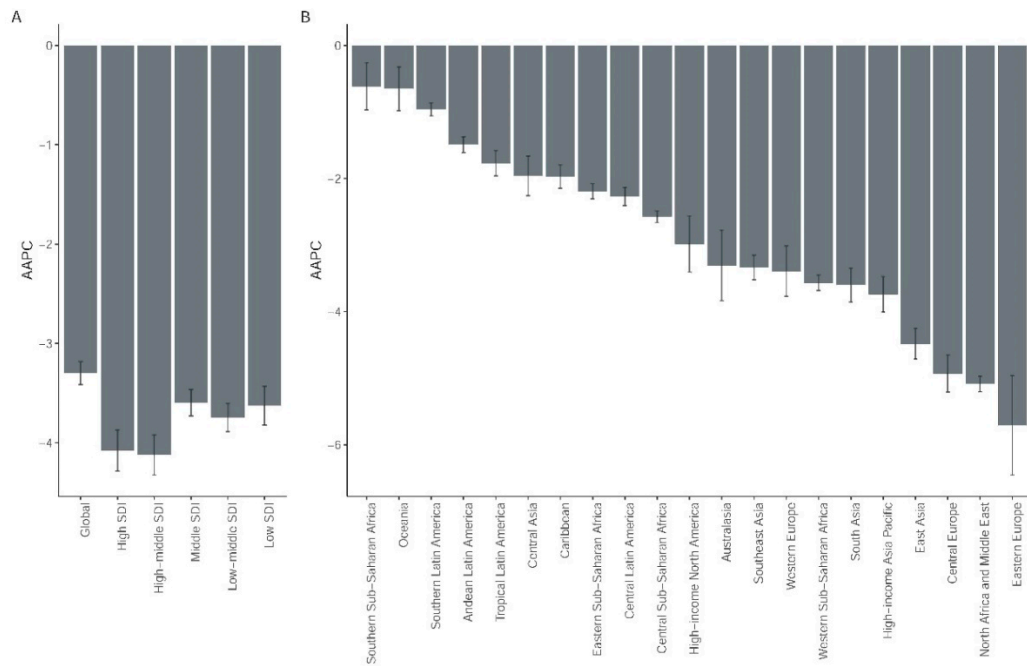

**Figure S4** Average annual percentage change (AAPC) in age-standardized disability-adjusted life years (DALYs) rates due to rheumatic heart disease among children aged 0–14 years by region, 1990–2021

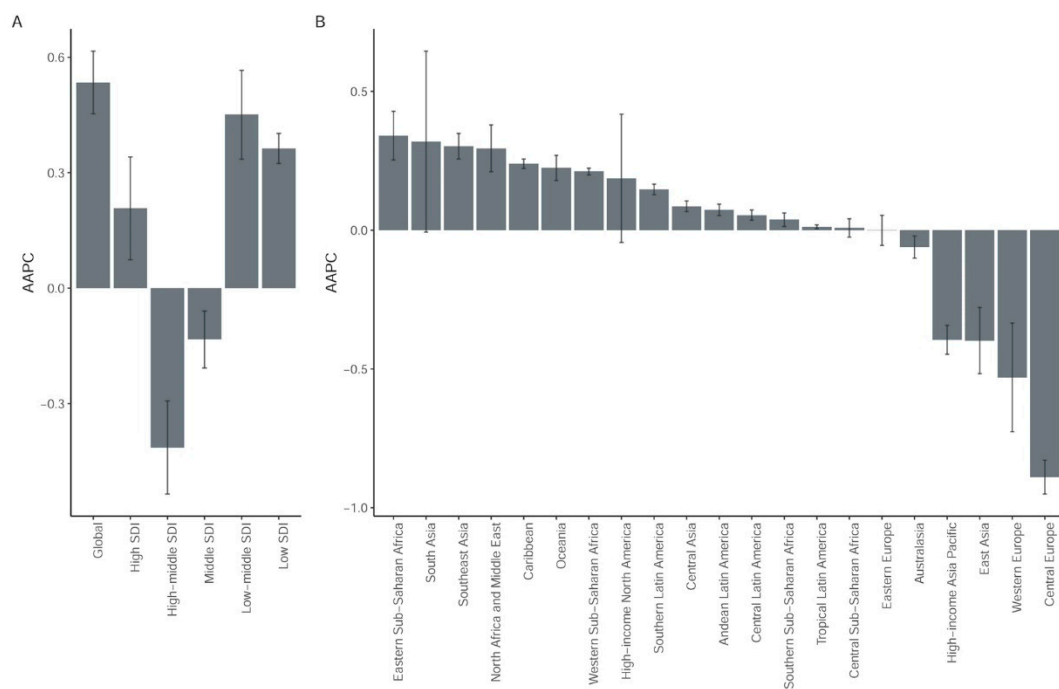

**Figure S5** Average annual percentage change (AAPC) in age-standardized prevalence rates due to rheumatic heart disease among children aged 0–14 years by region, 1990–2021

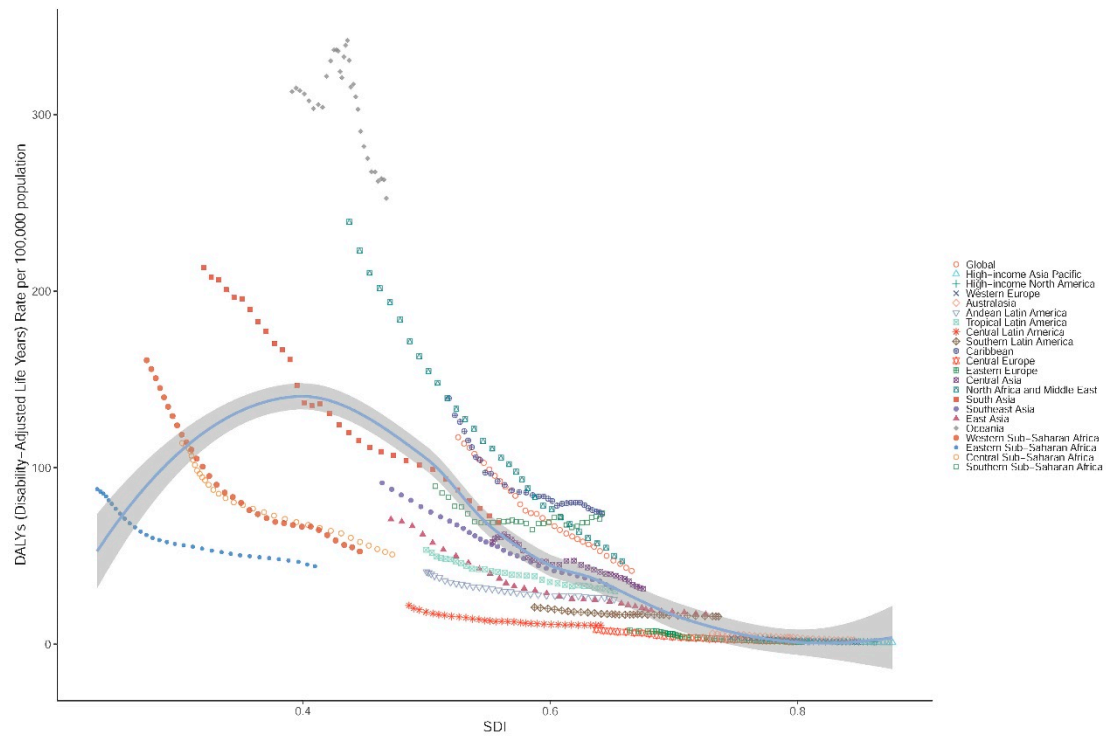

**Figure S6** Association between SDI and pediatric RHD DALYs rates by GBD regions, 1990-2021.

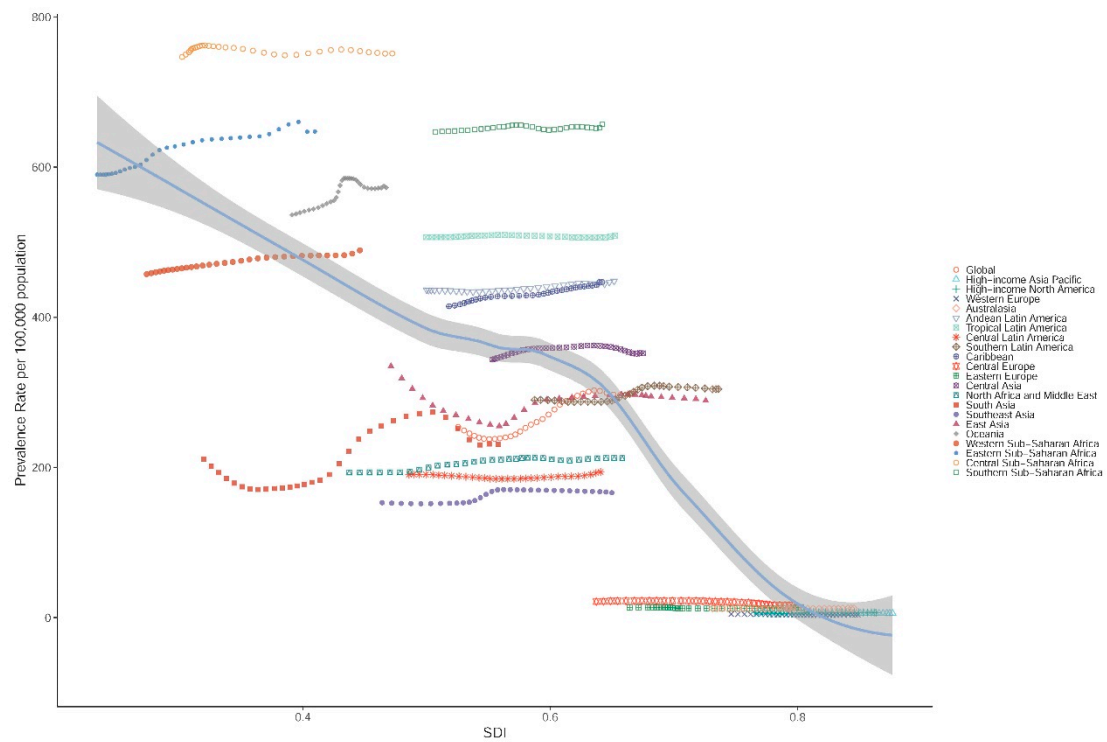

**Figure S7** Association between SDI and pediatric RHD prevalence rates by GBD regions, 1990-2021.

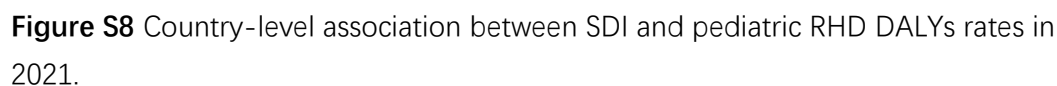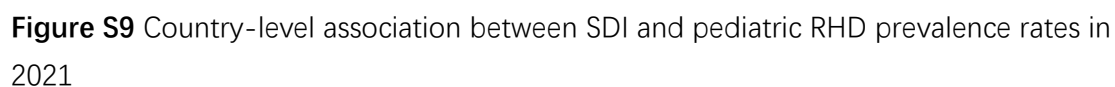

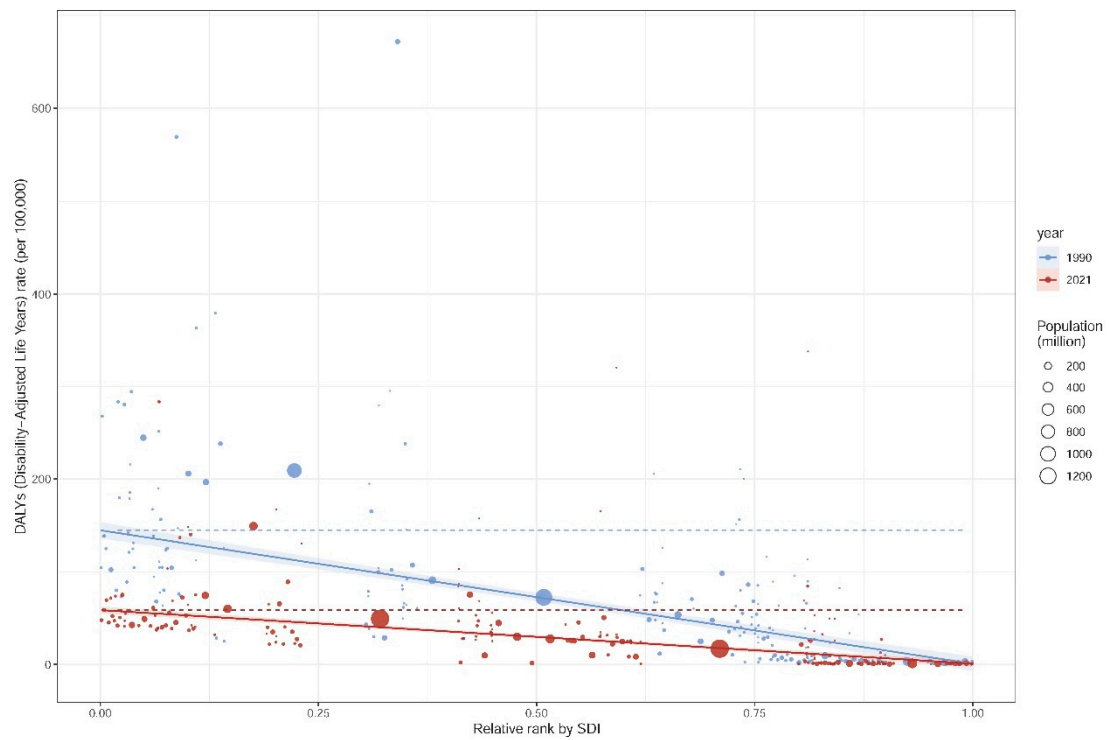

**Figure S10** Slope indices of inequality for RHD-related DALYs in children aged 0–14 years, by SDI ranking, 1990 vs. 2021

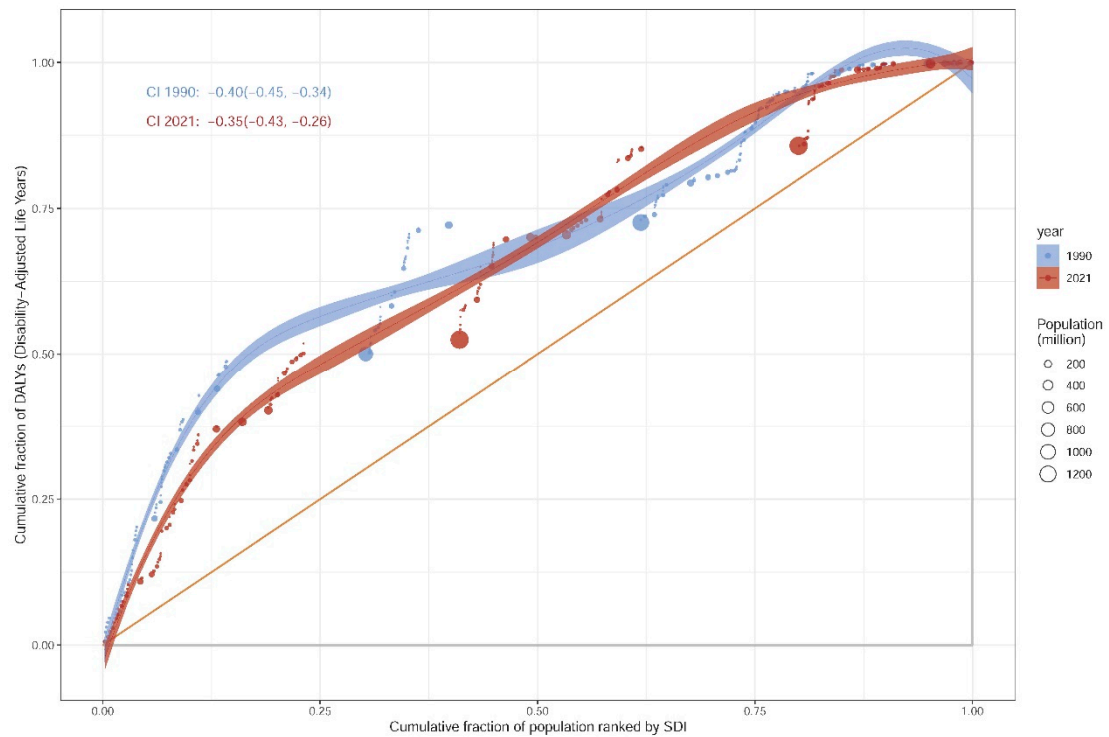

**Figure S11** Concentration indices of inequality for RHD-related DALYs in children aged 0–14 years, by SDI ranking, 1990 vs. 2021



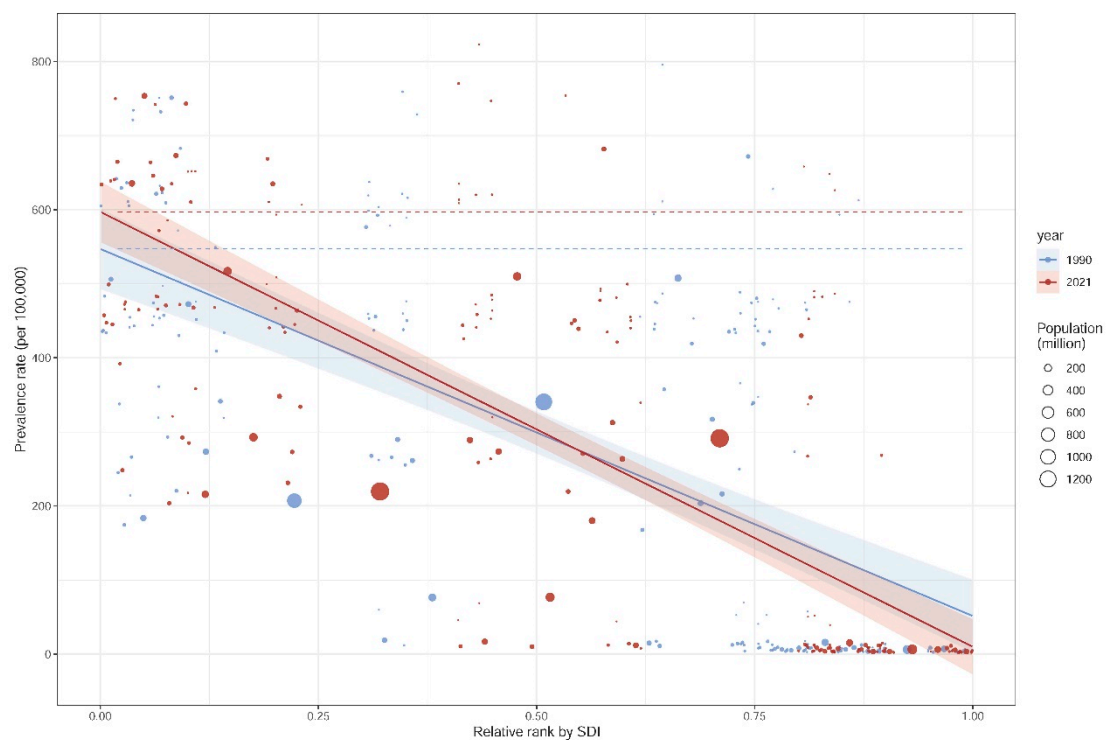

**Figure S12** Slope indices of inequality for RHD-related prevalence, in children aged 0–14 years, by SDI ranking, 1990 vs. 2021

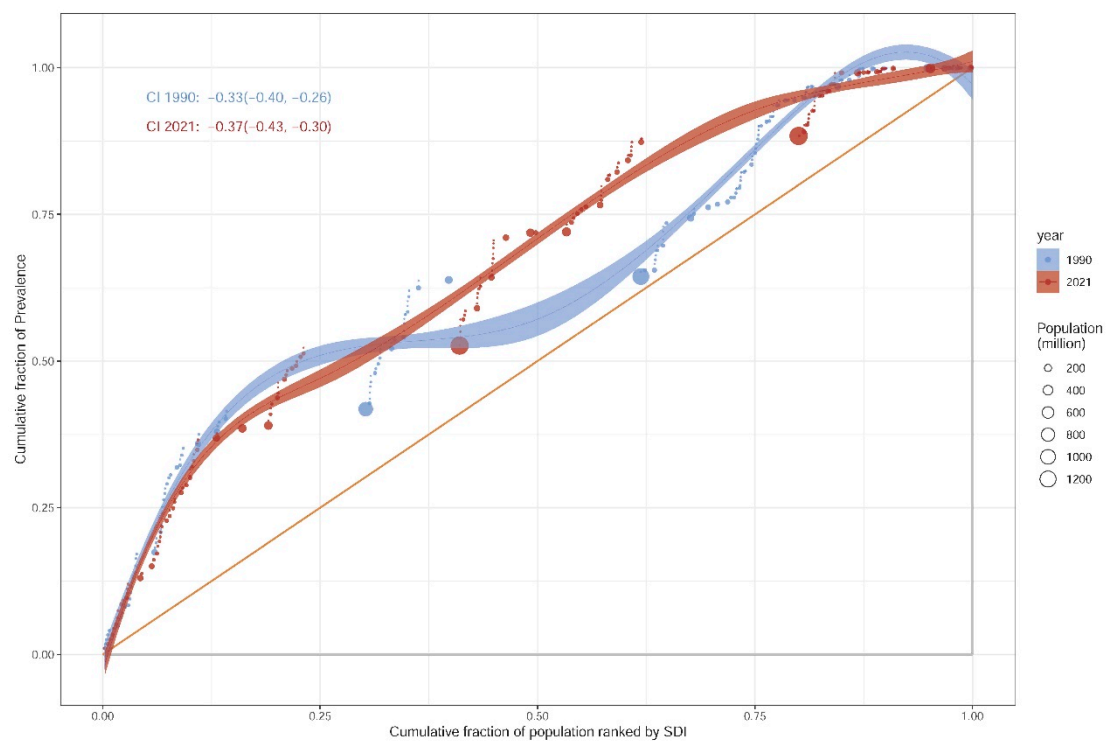

**Figure S13** Concentration indices of inequality for RHD-related prevalence in children

aged 0–14 years, by SDI ranking, 1990 vs. 2021
