# Supplementary material for: Global Burden of Pediatric Rheumatic Heart Disease, 1990–2021: Analysis of the GBD 2021 Study
Source: MDPI journal article supplement (doi:10.3390/children12070843), 2025-06-26
Supplement: s1 [file Table S1.pdf › Table S1.pdf]

**Table S1 Age-standardized disability-adjusted life year rates of rheumatic heart disease among children aged 0–14 years, 1990–2021**

| Location name                | 1990 cases                        | 1990 ASR of DALYs (per 100, 000, 95% UI) | 2021 cases                      | 2021 ASR of DALYs (per 100, 000, 95% UI) | AAPC (% 95% CI)      |
|------------------------------|-----------------------------------|------------------------------------------|---------------------------------|------------------------------------------|----------------------|
| Global                       | 2044552.08(1627943.46,2634901.55) | 117.22(90.07,154.09)                     | 848879.08(668828.15,1076343.83) | 41.56(31.65,54.84)                       | -3.30 (-3.41, -3.18) |
| High SDI                     | 11838.32(10015.09,14192.41)       | 6.37(5.25,7.90)                          | 2995.35(2470.35,3636.83)        | 1.69(1.39,2.08)                          | -4.08 (-4.29, -3.87) |
| High-middle SDI              | 97943.84(82348.75,116436.74)      | 35.77(29.52,43.98)                       | 23553.50(17063.70,32582.44)     | 9.77(6.88,13.74)                         | -4.12 (-4.32, -3.92) |
| Middle SDI                   | 498425.12(422687.42,583213.25)    | 86.27(71.29,104.48)                      | 166794.40(127078.62,219792.74)  | 28.09(20.93,38.52)                       | -3.60 (-3.73, -3.47) |
| Low-middle SDI               | 967576.70(754430.68,1265143.95)   | 203.43(152.26,273.55)                    | 366383.09(296626.21,454118.11)  | 62.24(48.86,79.33)                       | -3.75 (-3.89, -3.60) |
| Low SDI                      | 467179.36(329176.17,665361.72)    | 196.97(135.51,279.97)                    | 288059.67(212336.08,379369.98)  | 62.84(44.01,88.03)                       | -3.63 (-3.82, -3.43) |
| Andean Latin America         | 6074.40(4413.19,8324.68)          | 41.04(28.65,57.78)                       | 4689.79(2858.65,7298.27)        | 25.48(15.07,40.60)                       | -1.49 (-1.61, -1.37) |
| Australasia                  | 282.61(249.57,319.30)             | 6.07(5.21,7.09)                          | 126.05(103.93,155.61)           | 2.12(1.70,2.66)                          | -3.31 (-3.84, -2.78) |
| Caribbean                    | 15964.23(12096.39,20840.02)       | 139.36(95.32,193.01)                     | 8576.73(6238.56,11314.66)       | 73.69(48.84,106.01)                      | -1.97 (-2.15, -1.79) |
| Central Asia                 | 14178.20(11996.89,16808.93)       | 57.84(47.48,71.10)                       | 8523.81(6290.02,11545.22)       | 31.35(22.50,43.40)                       | -1.96 (-2.25, -1.66) |
| Central Europe               | 2473.49(2278.81,2697.72)          | 8.26(7.46,9.21)                          | 303.46(234.22,399.34)           | 1.64(1.24,2.17)                          | -4.93 (-5.21, -4.65) |
| Central Latin America        | 14081.34(11507.65,17978.44)       | 21.94(17.56,28.64)                       | 7181.94(4386.13,11284.30)       | 10.69(6.21,17.12)                        | -2.27 (-2.40, -2.13) |
| Central Sub-Saharan Africa   | 29282.95(18834.14,41481.86)       | 113.89(64.30,175.50)                     | 29371.78(18800.40,42727.59)     | 50.86(30.70,77.64)                       | -2.57 (-2.66, -2.49) |
| East Asia                    | 234099.22(192595.59,287566.97)    | 70.72(55.43,88.87)                       | 47649.63(29650.72,71932.76)     | 16.96(10.32,26.45)                       | -4.48 (-4.71, -4.25) |
| Eastern Europe               | 4113.46(3904.01,4386.44)          | 7.91(7.45,8.50)                          | 481.54(373.43,621.86)           | 1.28(0.98,1.65)                          | -5.71 (-6.45, -4.96) |
| Eastern Sub-Saharan Africa   | 80036.00(56478.56,110741.51)      | 87.80(57.45,128.03)                      | 78213.92(48995.16,113455.84)    | 44.18(26.37,68.11)                       | -2.19 (-2.30, -2.08) |
| High-income Asia Pacific     | 880.74(767.39,1011.75)            | 2.44(2.05,2.91)                          | 174.16(140.80,217.09)           | 0.75(0.60,0.94)                          | -3.74 (-4.01, -3.48) |
| High-income North America    | 2173.27(2043.58,2343.37)          | 3.52(3.26,3.83)                          | 830.59(712.56,977.57)           | 1.25(1.06,1.51)                          | -2.98 (-3.41, -2.56) |
| North Africa and Middle East | 339807.94(236129.72,458824.73)    | 239.32(158.68,333.43)                    | 86370.70(66079.55,115831.62)    | 47.11(34.47,65.82)                       | -5.09 (-5.20, -4.97) |
| Oceania                      | 8323.07(5072.01,11985.20)         | 313.00(184.79,472.56)                    | 12643.96(8887.10,17878.93)      | 252.61(166.05,371.38)                    | -0.65 (-0.98, -0.32) |
| South Asia                   | 930328.09(683903.34,1290449.37)   | 213.31(149.54,298.05)                    | 357205.23(284334.21,450876.78)  | 68.82(52.16,89.73)                       | -3.60 (-3.85, -3.35) |
| Southeast Asia               | 157039.79(122891.53,190549.12)    | 91.37(63.82,114.90)                      | 57250.13(43009.79,70594.02)     | 31.92(23.62,39.99)                       | -3.34 (-3.52, -3.15) |
| Southern Latin America       | 3141.21(2160.71,4595.43)          | 20.85(14.11,30.87)                       | 2433.25(1424.08,3749.01)        | 15.57(8.76,25.14)                        | -0.96 (-1.06, -0.86) |
| Southern Sub-Saharan Africa  | 18366.81(14128.54,23229.61)       | 89.42(62.28,119.62)                      | 18303.43(13910.98,23693.99)     | 74.33(53.23,99.32)                       | -0.61 (-0.97, -0.26) |
| Tropical Latin America       | 29833.46(23473.25,38660.14)       | 53.52(41.78,70.13)                       | 15320.91(9436.45,23352.90)      | 29.99(18.33,46.62)                       | -1.77 (-1.96, -1.58) |
| Western Europe               | 2677.70(2526.48,2869.68)          | 3.74(3.49,4.03)                          | 865.91(753.73,1010.21)          | 1.24(1.06,1.46)                          | -3.39 (-3.77, -3.01) |
| Western Sub-Saharan Africa   | 151394.10(100173.56,218799.23)    | 160.86(100.55,237.84)                    | 112362.17(74614.46,151763.24)   | 52.58(31.26,77.80)                       | -3.57 (-3.68, -3.45) |

**Abbreviations:** UI – uncertainty interval; AAPC – average annual percentage change; CI – confidence interval; SDI – Socio-demographic Index.
