# Supplementary material for: Global Burden of Pediatric Rheumatic Heart Disease, 1990–2021: Analysis of the GBD 2021 Study
Source: MDPI journal article supplement (doi:10.3390/children12070843), 2025-06-26
Supplement: s1 [file Table S2.pdf › Table S2.pdf]

**Table S2. Age-standardized prevalence rate (ASPR) of rheumatic heart disease among children aged 0–14 years by global, regional, and SDI-level, 1990–2021**

| Location name                | 1990 cases                        | 1990 ASPR (per 100, 000, 95% UI) | 2021 cases                        | 2021ASPR (per 100, 000, 95% UI) | AAPC (% 95% CI)      |
|------------------------------|-----------------------------------|----------------------------------|-----------------------------------|---------------------------------|----------------------|
| Global                       | 4366755.26(3001305.32,6068514.05) | 253.82(167.38,366.88)            | 6226651.48(4235279.87,8726561.69) | 298.55(194.94,435.24)           | 0.53 (0.45, 0.62)    |
| High SDI                     | 21345.12(16847.97,26094.13)       | 11.25(8.67,14.09)                | 21339.39(16765.94,26358.52)       | 11.84(9.17,14.82)               | 0.21 (0.07, 0.34)    |
| High-middle SDI              | 383089.08(268515.77,519825.84)    | 136.97(93.98,193.39)             | 294712.43(206808.35,403438.54)    | 120.21(81.96,171.06)            | -0.41 (-0.54, -0.29) |
| Middle SDI                   | 1766680.83(1205378.62,2456357.01) | 304.17(200.75,438.41)            | 1754272.62(1195652.25,2450394.94) | 292.36(191.89,424.33)           | -0.13 (-0.21, -0.06) |
| Low-middle SDI               | 1273069.94(859650.75,1772461.20)  | 279.54(181.43,406.50)            | 1937966.11(1306331.39,2728620.36) | 322.33(207.96,470.50)           | 0.45 (0.33, 0.57)    |
| Low SDI                      | 919096.68(629253.81,1285901.30)   | 437.23(284.35,635.09)            | 2213480.50(1493243.98,3098127.37) | 488.29(317.07,718.84)           | 0.36 (0.32, 0.40)    |
| Andean Latin America         | 64404.59(43281.85,89933.01)       | 436.48(287.41,633.80)            | 82553.58(56095.68,114785.21)      | 448.16(292.95,650.25)           | 0.07 (0.05, 0.09)    |
| Australasia                  | 582.59(403.86,802.40)             | 12.50(8.37,17.90)                | 722.91(508.57,991.77)             | 12.20(8.37,17.05)               | -0.06 (-0.10, -0.02) |
| Caribbean                    | 46820.31(31895.50,65080.26)       | 414.60(272.09,597.86)            | 52796.22(36139.95,74575.99)       | 446.83(290.79,644.30)           | 0.24 (0.22, 0.26)    |
| Central Asia                 | 81605.39(56319.87,112441.23)      | 343.59(227.51,496.81)            | 94973.23(65622.71,132968.25)      | 352.00(232.82,508.54)           | 0.09 (0.07, 0.11)    |
| Central Europe               | 6718.75(4978.81,8690.24)          | 21.45(15.52,28.23)               | 3041.01(2311.10,3864.97)          | 16.27(11.97,21.18)              | -0.89 (-0.95, -0.83) |
| Central Latin America        | 122053.02(85492.04,169300.81)     | 190.68(127.92,271.49)            | 130338.51(90135.60,181414.89)     | 193.83(129.59,278.77)           | 0.05 (0.04, 0.07)    |
| Central Sub-Saharan Africa   | 169805.32(114446.05,239804.23)    | 746.70(487.50,1085.15)           | 431662.13(288495.11,614888.48)    | 751.30(485.77,1094.51)          | 0.01 (-0.03, 0.04)   |
| East Asia                    | 1112794.69(760541.21,1534774.07)  | 334.75(222.55,477.83)            | 817734.08(566099.49,1125562.06)   | 289.06(192.52,416.93)           | -0.40 (-0.52, -0.28) |
| Eastern Europe               | 7026.10(5480.84,8718.05)          | 13.46(10.29,17.26)               | 5072.72(3973.13,6252.00)          | 13.40(10.17,17.00)              | -0.00 (-0.06, 0.05)  |
| Eastern Sub-Saharan Africa   | 491987.13(335490.37,689706.08)    | 589.79(385.46,856.52)            | 1142738.69(764500.08,1613615.26)  | 647.34(419.88,947.38)           | 0.34 (0.25, 0.43)    |
| High-income Asia Pacific     | 2501.07(1855.06,3333.17)          | 6.76(4.85,9.19)                  | 1385.84(1062.68,1763.98)          | 5.95(4.52,7.65)                 | -0.40 (-0.45, -0.34) |
| High-income North America    | 3916.19(2951.33,5124.84)          | 6.35(4.62,8.57)                  | 4437.52(3492.70,5591.96)          | 6.56(5.04,8.39)                 | 0.19 (-0.04, 0.42)   |
| North Africa and Middle East | 264298.76(183141.56,360464.97)    | 193.31(129.06,277.89)            | 397375.92(269914.28,550779.91)    | 212.31(138.35,308.53)           | 0.29 (0.21, 0.38)    |
| Oceania                      | 13868.49(9968.25,18538.75)        | 536.17(373.22,754.80)            | 27838.57(19831.89,37376.42)       | 572.61(396.45,806.34)           | 0.22 (0.18, 0.27)    |
| South Asia                   | 886526.25(585993.46,1264529.72)   | 211.43(133.85,310.42)            | 1251437.39(807940.45,1798140.21)  | 230.44(143.91,339.71)           | 0.32 (-0.01, 0.64)   |
| Southeast Asia               | 264639.97(184458.41,358005.49)    | 153.00(103.81,217.77)            | 299134.38(206995.97,411330.45)    | 166.33(111.60,237.79)           | 0.30 (0.26, 0.35)    |
| Southern Latin America       | 43753.12(30420.49,59771.18)       | 289.92(194.33,412.19)            | 47633.83(32941.04,65397.65)       | 304.36(204.17,434.57)           | 0.15 (0.13, 0.17)    |
| Southern Sub-Saharan Africa  | 131505.57(88492.35,182491.03)     | 646.99(425.40,940.21)            | 162641.12(109252.37,227916.72)    | 656.87(433.29,950.87)           | 0.04 (0.01, 0.06)    |
| Tropical Latin America       | 284256.66(191652.23,402514.96)    | 506.67(333.41,736.68)            | 260053.71(175641.58,367288.94)    | 508.85(335.52,740.02)           | 0.01 (0.01, 0.02)    |
| Western Europe               | 3448.03(2426.49,4681.88)          | 4.73(3.26,6.65)                  | 2722.79(1923.07,3680.55)          | 3.88(2.70,5.38)                 | -0.53 (-0.73, -0.34) |
| Western Sub-Saharan Africa   | 364243.26(248154.99,504381.20)    | 457.39(299.00,666.99)            | 1010357.32(681023.04,1406541.95)  | 489.10(319.45,713.43)           | 0.21 (0.20, 0.22)    |

**Abbreviations:** UI – uncertainty interval; AAPC – average annual percentage change; CI – confidence interval; SDI – Socio-demographic Index.
